# Supplementary material
Source: Springer Nature journal article supplement (https://www.springermedizin.de/resource/supplementary/12889_2011_3439_MOESM2_ESM.pdf/9489008)
Supplement: MOESM2 [file 9489008]

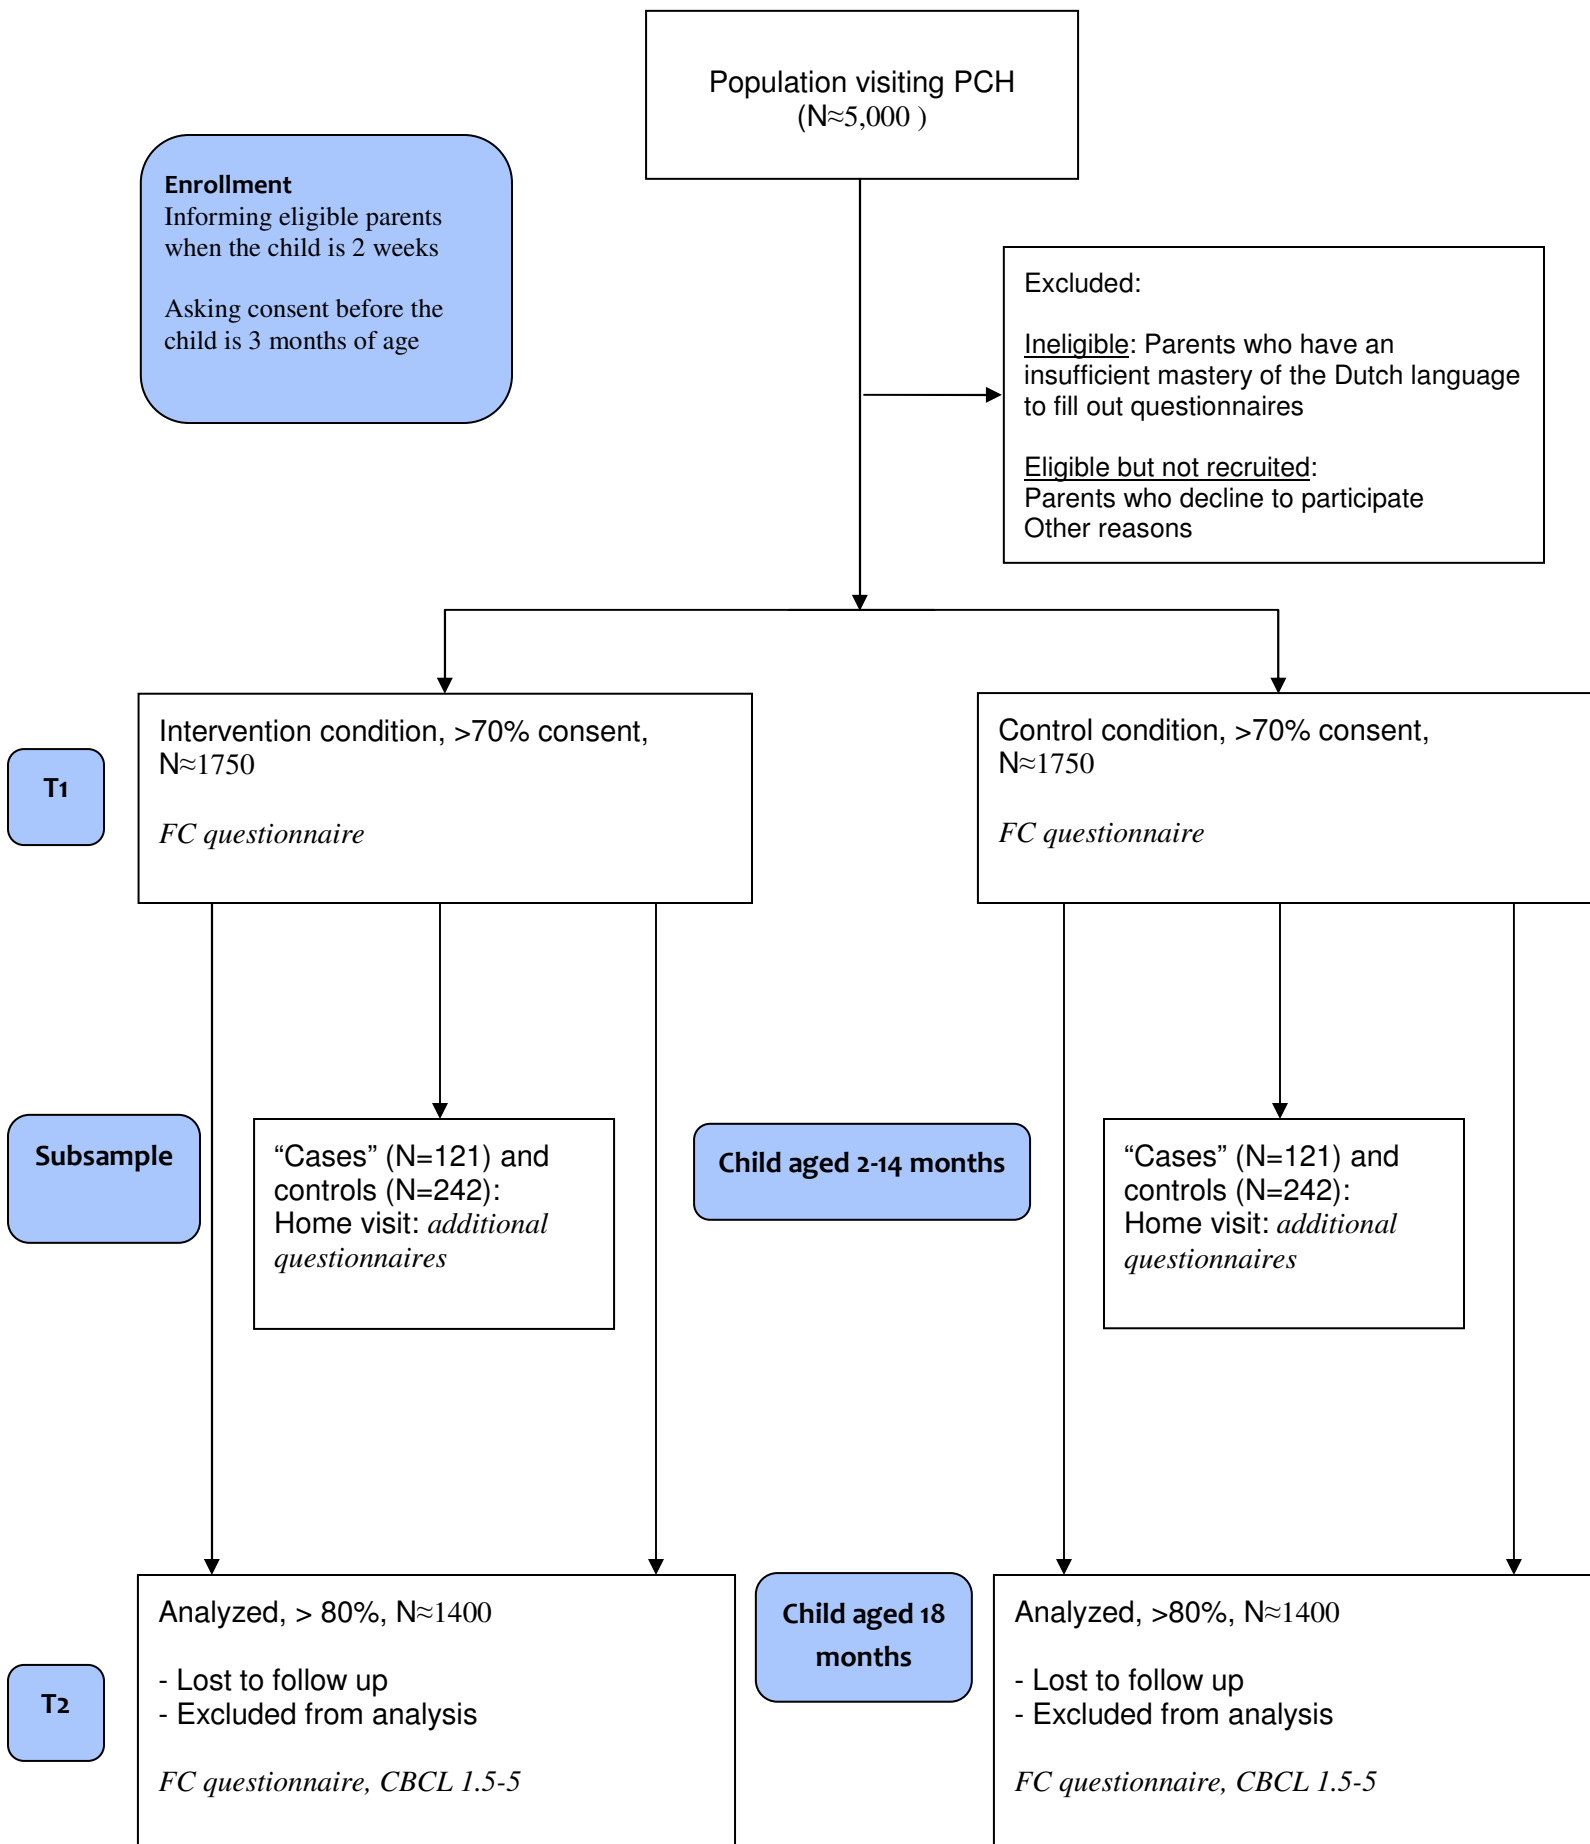

For all participating children aged 0-18 months, CHPs will register within the medical records whether they have identified any (risks for) psychosocial problems during each regular well-child visit.
